# Supplementary material for: A cross-sectional study of demonstrating expertise and job satisfaction in pharmacists and dietitians working in community pharmacies in Japan
Source: Research Square preprint supplement (doi:10.21203/rs.3.rs-1042844/v1), 2021-11-12
Supplement: Supplementary file 2 [file 7dd50460770fd02e194f8ec1.xlsx]

## Sheet: Table１
	Table 1 Comparison of scores for each question across occupations
		Pharmacists	Dietitians	p
		(n=22)	(n=39)
	I want to work at my current workplace for a long time to come.	3.27	3.54	0.24
	I am using my expertise in my current work.	3.27	2.56	0.01
	I think I am helpful to patients.	3.5	3	0.02
	I think I am engaged in important work.	3.32	2.85	0.04
	I can grow sufficiently as a professional.	3.27	2.41	0.01
	I have colleagues at my current workplace whom I can talk to when I have a problem.	3.32	3.51	0.44
	I am satisfied with my current job.	3.14	3.23	0.7

## Sheet: Table2
	Table 2 Results of Factor Analysis
		Factor
		1	2
	I think I am engaged in important work.	0.801	0.041
	I think I am engaged in important work.	0.799	-0.016
	I am using my expertise in current work.	0.769	-0.046
	I think I am helpful to patients.	0.754	0.057
	I am satisfied with my current job.	0.062	0.87
	I have colleagues at my current workplace whom I can talk to when I have a problem.	-0.091	0.697
	I want to work at my current workplace for a long time to come.	0.116	0.643

## Sheet: Sheet3
	Table 3 Comparison of the factor scores across occupations
		Pharmacists (n=22)	Dietitians (n=39)	p
	Demonstration of expertise	3.34	2.71	<0.01
	Overall job satisfaction	3.24	3.43	0.36
